# Supplementary material for: Gut microbiota of dogs with cancer receiving anti-EGFR/HER2 immunization reveals potential biomarkers of patient survival
Source: Research Square preprint supplement (doi:10.21203/rs.3.rs-7143601/v1), 2025-07-27
Supplement: Supplementary file 1 [file ff0e39dd1812159ec2c0536a.xlsx]

## Sheet: SuppTable_1_metadata_dogs
*sample_name	Sex	Breed	Cancer_3_categs	Cancer_HSA_or_not	Cancer_OSA_or_not	Age_at_diagnosis_years	Surv_months	Surv_days	survival_0_alive_unknown__1_dead	host_common_name
sh1A1	Female	Mixed	Osteosarcoma	Osteosarcoma_Other	Osteosarcoma	3.35616	12.4333	373	0	dog
sh1A11	Male	Pure	Other	Osteosarcoma_Other	Hemangiosarcoma_Other	10.5123	8.66667	260	1	dog
sh1A5	Female	Pure	Other	Osteosarcoma_Other	Hemangiosarcoma_Other	11.3644	17.8	534	0	dog
sh1A6	Male	Mixed	Other	Osteosarcoma_Other	Hemangiosarcoma_Other	10.9562	22.3	669	0	dog
sh1A7	Female	Mixed	Osteosarcoma	Osteosarcoma_Other	Osteosarcoma	9.19178	2.93333	88	1	dog
sh1A8	Male	Pure	Osteosarcoma	Osteosarcoma_Other	Osteosarcoma	6.31781	26.7333	802	1	dog
sh1A9	Male	Mixed	Other	Osteosarcoma_Other	Hemangiosarcoma_Other	9.47671	15.8	474	1	dog
sh1B10	Female	Pure	Other	Osteosarcoma_Other	Hemangiosarcoma_Other	4.97534	3.23333	97	1	dog
sh1B11	Female	Pure	Osteosarcoma	Osteosarcoma_Other	Osteosarcoma	12.6685	4.56667	137	1	dog
sh1B2	Female	Pure	Osteosarcoma	Osteosarcoma_Other	Osteosarcoma	6.02466	3.46667	104	1	dog
sh1B3	Female	Pure	Osteosarcoma	Osteosarcoma_Other	Osteosarcoma	6.21096	5.43333	163	1	dog
sh1B9	Female	Pure	Other	Osteosarcoma_Other	Hemangiosarcoma_Other	8.76164	3.46667	104	1	dog
sh1C10	Male	Pure	Hemangiosarcoma	Hemangiosarcoma	Hemangiosarcoma_Other	12.0767	1.8	54	1	dog
sh1C11	Male	Pure	Hemangiosarcoma	Hemangiosarcoma	Hemangiosarcoma_Other	8.48493	4.9	147	1	dog
sh1C4	Male	Mixed	Other	Osteosarcoma_Other	Hemangiosarcoma_Other	11.4822	21.4	642	1	dog
sh1C5	Male	Mixed	Osteosarcoma	Osteosarcoma_Other	Osteosarcoma	11.0685	6.2	186	1	dog
sh1C6	Female	Pure	Hemangiosarcoma	Hemangiosarcoma	Hemangiosarcoma_Other	7.47123	2.7	81	1	dog
sh1C7	Female	Mixed	Other	Osteosarcoma_Other	Hemangiosarcoma_Other	9.1589	10.9	327	1	dog
sh1C8	Male	Pure	Hemangiosarcoma	Hemangiosarcoma	Hemangiosarcoma_Other	13.0329	4.23333	127	1	dog
sh1C9	Female	Pure	Other	Osteosarcoma_Other	Hemangiosarcoma_Other	9.79726	23.4	702	0	dog
sh1D1	Female	Pure	Other	Osteosarcoma_Other	Hemangiosarcoma_Other	12.9425	2.13333	64	1	dog
sh1D10	Male	Pure	Other	Osteosarcoma_Other	Hemangiosarcoma_Other	7.6411	9.33333	280	1	dog
sh1D11	Male	Pure	Other	Osteosarcoma_Other	Hemangiosarcoma_Other	8.07945	1.93333	58	1	dog
sh1D2	Male	Pure	Other	Osteosarcoma_Other	Hemangiosarcoma_Other	5.72055	11.2	336	1	dog
sh1D3	Male	Mixed	Hemangiosarcoma	Hemangiosarcoma	Hemangiosarcoma_Other	7.73973	5.26667	158	1	dog
sh1D9	Female	Pure	Osteosarcoma	Osteosarcoma_Other	Osteosarcoma	6.47945	10.4	312	1	dog
sh1E10	Male	Pure	Other	Osteosarcoma_Other	Hemangiosarcoma_Other	11.7699	12.6333	379	1	dog
sh1E4	Female	Mixed	Osteosarcoma	Osteosarcoma_Other	Osteosarcoma	10.4137	13.9	417	1	dog
sh1E5	Female	Mixed	Osteosarcoma	Osteosarcoma_Other	Osteosarcoma	4.2274	76.7	2301	0	dog
sh1E6	Male	Pure	Osteosarcoma	Osteosarcoma_Other	Osteosarcoma	7.15616	12.8333	385	1	dog
sh1E7	Female	Pure	Osteosarcoma	Osteosarcoma_Other	Osteosarcoma	9.64384	8.5	255	1	dog
sh1E8	Female	Pure	Osteosarcoma	Osteosarcoma_Other	Osteosarcoma	9.65753	7.56667	227	1	dog
sh1E9	Female	Mixed	Osteosarcoma	Osteosarcoma_Other	Osteosarcoma	7.77534	1.6	48	1	dog
sh1F1	Female	Pure	Other	Osteosarcoma_Other	Hemangiosarcoma_Other	12.2986	15.2667	458	1	dog
sh1F10	Female	Pure	Osteosarcoma	Osteosarcoma_Other	Osteosarcoma	9.36986	14.2667	428	0	dog
sh1F2	Male	Mixed	Other	Osteosarcoma_Other	Hemangiosarcoma_Other	12	2.7	81	1	dog
sh1F3	Female	Pure	Other	Osteosarcoma_Other	Hemangiosarcoma_Other	11.9014	10.1667	305	1	dog
sh1F9	Female	Pure	Other	Osteosarcoma_Other	Hemangiosarcoma_Other	7.39726	33.4667	1004	0	dog
sh1G10	Female	Mixed	Hemangiosarcoma	Hemangiosarcoma	Hemangiosarcoma_Other	7.24384	1.86667	56	1	dog
sh1G4	Female	Mixed	Hemangiosarcoma	Hemangiosarcoma	Hemangiosarcoma_Other	14.589	8.93333	268	1	dog
sh1G5	Female	Pure	Osteosarcoma	Osteosarcoma_Other	Osteosarcoma	8.22192	16.1333	484	0	dog
sh1G6	Male	Pure	Hemangiosarcoma	Hemangiosarcoma	Hemangiosarcoma_Other	10.189	3.63333	109	1	dog
sh1G7	Male	Mixed	Osteosarcoma	Osteosarcoma_Other	Osteosarcoma	12.9068	5	150	1	dog
sh1G8	Male	Pure	Osteosarcoma	Osteosarcoma_Other	Osteosarcoma	8.31781	2.66667	80	1	dog
sh1G9	Male	Pure	Other	Osteosarcoma_Other	Hemangiosarcoma_Other	11.9233	0.6	18	1	dog
sh1H1	Female	Pure	Other	Osteosarcoma_Other	Hemangiosarcoma_Other	14.5205	12.6	378	1	dog
sh1H10	Male	Pure	Osteosarcoma	Osteosarcoma_Other	Osteosarcoma	11.2192	5.23333	157	1	dog
sh1H2	Female	Pure	Osteosarcoma	Osteosarcoma_Other	Osteosarcoma	11.0137	7.83333	235	1	dog
sh1H3	Female	Mixed	Osteosarcoma	Osteosarcoma_Other	Osteosarcoma	12.0493	3.5	105	1	dog
sh1H8	Male	Pure	Other	Osteosarcoma_Other	Hemangiosarcoma_Other	11.7534	9.06667	272	1	dog
sh1H9	Male	Mixed	Osteosarcoma	Osteosarcoma_Other	Osteosarcoma	7.29589	17.2	516	1	dog

## Sheet: SuppTable_2_alpha-diversity
	Comparisons p-value
Alpha Diversity Metric	Breed	Gender	Cancer_OSA_or_not	Cancer_HSA_or_not	HSA_vs_OSA	OSA_vs_Other	HSA_vs_Other
Number of Observed Features	0.98	0.35	0.85	0.73	0.66	1	0.86
Chao1 Index	0.98	0.35	0.85	0.73	0.66	1	0.86
Shannon Index	0.92	0.85	0.9	1	0.96	0.85	0.94
Simpson Index	0.84	0.89	0.88	0.78	0.83	0.94	0.79
Inverse Simpson Index	0.89	0.87	1	0.79	0.87	0.93	0.75

## Sheet: SupplTable_3_top 11_taxa
ASV (amplicon sequence variant) with taxonomy from Qiime2	Family__Genus assignment shown in Figs 4, 5	HR	CI	p_value	FDR (qval from FDR1 across lkts )	Cutpoint	Biomarker < Cutpoint	Biomarker >= Cutpoint	HR	HR.low	HR.high	Pr(>|z|)	Score_(logrank)_test P-value	MegaBLAST top hit	% identity MegaBLAST	fasta seq of ASV
X5df1c5c06a1966d13b17f1f5df672777__D_0__Bacteria..D_1__Firmicutes..D_2__Clostridia..D_3__Clostridiales..D_4__Lachnospiraceae..D_5__Blautia..D_6__uncultured.bacterium	Lachnospiraceae__Blautia	3.87	( 1.69 - 8.86 )	0.000558	0.0202152	730.06	43 ( 84% )	8 ( 16% )	3.87	1.69	8.86	0.00132	0.000558	[Clostridium] asparagiforme strain N6	96.047	TACGTAGGGGGCAAGCGTTATCCGGATTTACTGGGTGTAAAGGGAGCGTAGACGGCATGGCAAGTCTGATGTGAAAACTTGGGGCTCAACCCCAAGACTGCATTGGAAACTGTTAAGCTAGAGTGCAGGAGAGGTAAGCGGAATTCCTAGTGTAGCGGTGAAATGCGTAGATATTAGGAGGAACACCAGTGGCGAAGGCGGCTTACTGGACTGTAACTGACGTTGAGGCTCGAAAGCGTGGGGAGCAAACAGG
X5fbc483f79cd97d3a7253931f37c33e8__D_0__Bacteria..D_1__Firmicutes..D_2__Clostridia..D_3__Clostridiales..D_4__Ruminococcaceae..D_5__Flavonifractor	Ruminococcaceae__Flavonifractor	3.32	( 1.68 - 6.56 )	0.000269	0.0141283	1473.42	33 ( 65% )	18 ( 35% )	2.8	1.48	5.31	0.0016	0.00101	Flavonifractor plautii strain 265	100	TACGTAGGTGGCAAGCGTTATCCGGATTTACTGGGTGTAAAGGGCGTGTAGGCGGGATTGCAAGTCAGATGTGAAAACTGGGGGCTCAACCTCCAGCCTGCATTTGAAACTGTAGTTCTTGAGTGCTGGAGAGGCAATCGGAATTCCGTGTGTAGCGGTGAAATGCGTAGATATACGGAGGAACACCAGTGGCGAAGGCGGATTGCTGGACAGTAACTGACGCTGAGGCGCGAAAGCGTGGGGAGCAAACAGG
dbcdaca3ee9e9fe75d8829e87b8551dc__D_0__Bacteria..D_1__Proteobacteria..D_2__Gammaproteobacteria..D_3__Betaproteobacteriales..D_4__Burkholderiaceae..D_5__Sutterella..D_6__uncultured.bacterium	Burkholderiaceae__Sutterella	2.85	( 1.47 - 5.52 )	0.00124	0.0314098	23819.4	35 ( 69% )	16 ( 31% )	2.85	1.47	5.52	0.00196	0.00124	Sutterella massiliensis strain Marseille-P2435	100	TACGTAGGGTGCAAGCGTTAATCGGAATTACTGGGCGTAAAGCGTGCGCAGGCGGTTCTGTAAGACAGATGTGAAATCCCCGGGCTCAACCTGGGAATTGCATTTGTGACTGCAGGACTAGAGTTCATCAGAGGGGGGTGGAATTCCAAGTGTAGCAGTGAAATGCGTAGATATTTGGAAGAACACCAATGGCGAAGGCAGCCCCCTGGGATGCGACTGACGCTCATGCACGAAAGCGTGGGGAGCAAACAGG
X5225de25bf8902d5a02c4af6e90cb5e8__D_0__Bacteria..D_1__Firmicutes..D_2__Clostridia..D_3__Clostridiales..D_4__Lachnospiraceae..D_5__.Ruminococcus..gauvreauii.group..D_6__uncultured.bacterium	Lachnospiraceae__Ruminococcus..gauvreauii	2.72	( 1.36 - 5.45 )	0.00317	0.0332152	203.423	39 ( 76% )	12 ( 24% )	2.72	1.36	5.45	0.00454	0.00317	Tyzzerella nexilis DSM 1787	94.071	TACGTATGGAGCAAGCGTTATCCGGATTTACTGGGTGTAAAGGGAGCGTAGACGGTTGTGCAAGTCTGATGTGAAATTCCAGGGCTTAACCCTGGACCTGCATTGGAAACTGTATAACTAGAGTGTCGGAGAGGTGAGTGGAATTCCTAGTGTAGCGGTGAAATGCGTAGATATTAGGAGGAACACCAGTGGCGAAGGCGGCTCACTGGACGATAACTGACGTTGAGGCTCGAAAGCGTGGGGAGCAAACAGG
X6eaef2dd2e8097421a196c104a2b76c8__D_0__Bacteria..D_1__Firmicutes..D_2__Clostridia..D_3__Clostridiales..D_4__Lachnospiraceae..D_5__uncultured..D_6__uncultured.organism	Lachnospiraceae__uncultured	2.44	( 1.26 - 4.72 )	0.00654	0.0580349	1058.59	37 ( 73% )	14 ( 27% )	2.44	1.26	4.72	0.00836	0.00654	[Clostridium] amygdalinum strain BR-10	97.628	TACGTAGGGGGCAAGCGTTATCCGGATTTACTGGGTGTAAAGGGAGCGTAGACGGCGAAGCAAGTCTGAAGTGAAAGCCCGGGGCTTAACCCCGGGACTGCTTTGGAAACTGTTTTGCTAGAGTGCTGGAGAGGTAAGTGGAATTCCTAGTGTAGCGGTGAAATGCGTAGATATTAGGAGGAACACCAGTGGCGAAGGCGGCTTACTGGACAGTAACTGACGTTGAGGCTCGAAAGCGTGGGGAGCAAACAGG
X08a0cf376add32f3f4b57ec1e82a7a27__D_0__Bacteria..D_1__Firmicutes..D_2__Negativicutes..D_3__Selenomonadales..D_4__Veillonellaceae..D_5__Megamonas..D_6__uncultured.bacterium	Veillonellaceae__Megamonas	2.24	( 1.2 - 4.18 )	0.00934	0.0479552	141.675	25 ( 49% )	26 ( 51% )	2.24	1.2	4.18	0.0112	0.00934	Megamonas funiformis YIT 11815	100	TACGTAGGCGGCAAGCGTTGTCCGGAATTATTGGGCGTAAAGGGAGCGCAGGCGGGAAACTAAGCGGATCTTAAAAGTGCGGGGCTCAACCCCGTGATGGGGTCCGAACTGGTTTTCTTGAGTGCAGGAGAGGAAAGCGGAATTCCCAGTGTAGCGGTGAAATGCGTAGATATTGGGAAGAACACCAGTGGCGAAGGCGGCTTTCTGGACTGTAACTGACGCTGAGGCTCGAAAGCTAGGGTAGCGAACGGG
X149465e40c1bdbc6230588a58a4d6eb0__D_0__Bacteria..D_1__Firmicutes..D_2__Clostridia..D_3__Clostridiales..D_4__Ruminococcaceae..D_5__Ruminiclostridium.5	Ruminococcaceae__Ruminiclostridium.5	2.15	( 1.11 - 4.17 )	0.0195	0.0968236	108.137	36 ( 71% )	15 ( 29% )	2.15	1.11	4.17	0.0225	0.0195	Caproiciproducens galactitolivorans strain BS-1	95.669	TACGTAGGGAGCAAGCGTTGTCCGGATTTACTGGGTGTAAAGGGTGCGTAGGCGGCTAGGCAAGTCAGACGTGAAAACCATGGGCTCAACCTGTGGACTGCGTTTGAAACTGTTTAGCTTGAGTGAAGTAGAGGTAGGCGGAATTCCCGGTGTAGCGGTGAAATGCGTAGAGATCGGGAGGAACACCAGTGGCGAAGGCGGCCTACTGGGCTTTAACTGACGCTGAGGCACGAAAGCATGGGTAGCAAACAGG
d46e2205f0c6ecf67b51f83d111c509c__D_0__Bacteria..D_1__Proteobacteria..D_2__Gammaproteobacteria..D_3__Enterobacteriales..D_4__Enterobacteriaceae..D_5__Escherichia.Shigella	Enterobacteriaceae__Escherichia.Shigella	0.394	( 0.191 - 0.815 )	0.00944	0.071915	33651.1	35 ( 69% )	16 ( 31% )	0.394	0.191	0.815	0.0119	0.00944	Escherichia marmotae strain HT073016	100	TACGGAGGGTGCAAGCGTTAATCGGAATTACTGGGCGTAAAGCGCACGCAGGCGGTTTGTTAAGTCAGATGTGAAATCCCCGGGCTCAACCTGGGAACTGCATCTGATACTGGCAAGCTTGAGTCTCGTAGAGGGGGGTAGAATTCCAGGTGTAGCGGTGAAATGCGTAGAGATCTGGAGGAATACCGGTGGCGAAGGCGGCCCCCTGGACGAAGACTGACGCTCAGGTGCGAAAGCGTGGGGAGCAAACAGG
X9acb555d3c5dd77e9035a661e7ad1bb6__D_0__Bacteria..D_1__Firmicutes..D_2__Clostridia..D_3__Clostridiales..D_4__Clostridiaceae.1..D_5__Clostridium.sensu.stricto.1	Clostridiaceae.1__Clostridium.sensu.stricto.1	0.352	( 0.156 - 0.796 )	0.00877	0.0404874	1787.96	39 ( 76% )	12 ( 24% )	0.352	0.156	0.796	0.0121	0.00877	Clostridium saudiense strain JCC	100	TACGTAGGTGGCGAGCGTTGTCCGGATTTACTGGGCGTAAAGGGAGCGTAGGCGGACTTTTAAGTGAGATGTGAAATACCCGGGCTCAACTTGGGTGCTGCATTTCAAACTGGAAGTCTAGAGTGCAGGAGAGGAGAATGGAATTCCTAGTGTAGCGGTGAAATGCGTAGAGATTAGGAAGAACACCAGTGGCGAAGGCGATTCTCTGGACTGTAACTGACGCTGAGGCTCGAAAGCGTGGGGAGCAAACAGG
X9908fffab7ed4f3bec44cda2f5084d49__D_0__Bacteria..D_1__Firmicutes..D_2__Bacilli..D_3__Lactobacillales..D_4__Enterococcaceae..D_5__Enterococcus	Enterococcaceae__Enterococcus	0.331	( 0.173 - 0.632 )	0.000484	0.0145373	833.374	26 ( 51% )	25 ( 49% )	0.331	0.173	0.632	0.00081	0.000484	Enterococcus rivorum strain S299	100	TACGTAGGTGGCAAGCGTTGTCCGGATTTATTGGGCGTAAAGCGAGCGCAGGCGGTTTCTTAAGTCTGATGTGAAAGCCCCCGGCTCAACCGGGGAGGGTCATTGGAAACTGGGAGACTTGAGTGCAGAAGAGGAGAGTGGAATTCCATGTGTAGCGGTGAAATGCGTAGATATATGGAGGAACACCAGTGGCGAAGGCGGCTCTCTGGTCTGTAACTGACGCTGAGGCTCGAAAGCGTGGGGAGCAAACAGG
fd10066b8cc30cf6a7f1036e45437887__D_0__Bacteria..D_1__Actinobacteria..D_2__Actinobacteria..D_3__Corynebacteriales..D_4__Corynebacteriaceae..D_5__Corynebacterium	Corynebacteriaceae__Corynebacterium	0.288	( 0.118 - 0.704 )	0.00405	0.0392975	167.566	40 ( 78% )	11 ( 22% )	0.288	0.118	0.704	0.00637	0.00405	Corynebacterium lowii strain R-50085	100	TACGTAGGGTGCGAGCGTTGTCCGGATTTACTGGGCGTAAAGAGCTCGTAGGTGGTTTGTCGCGTCGTCTGTGAAATTCCGGGGCTTAACTCCGGGCGTGCAGGCGATACGGGCATAACTTGAGTGCTGTAGGGGTAACTGGAATTCCTGGTGTAGCGGTGGAATGCGCAGATATCAGGAGGAACACCGATGGCGAAGGCAGGTTACTGGGCAGTTACTGACGCTGAGGAGCGAAAGCATGGGTAGCGAACAGG
